# Supplementary material for: Global dissection of alternative splicing uncovers transcriptional diversity in tissues and associates with the flavonoid pathway in tea plant (Camellia sinensis)
Source: PubMed Central journal article supplement (PMC6219262; doi:10.1186/s12870-018-1497-9), 2018-11-06
Supplement: 12870_2018_1497_MOESM1_ESM.pdf [file 12870_2018_1497_MOESM1_ESM.pdf]

1 **Supplementary**

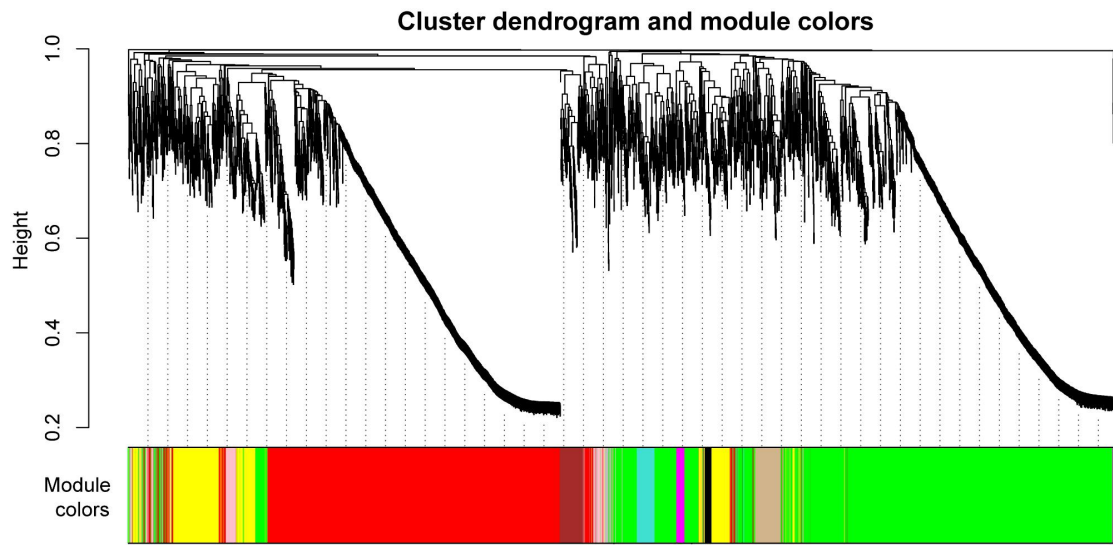

2  
3 **Supplementary Figure S1.** Hierarchical cluster tree showing co-expression modules  
4 identified by WGCNA. Each leaf in the tree represents one gene. The major tree branches  
5 constitute the 13 modules indicated by different colors.

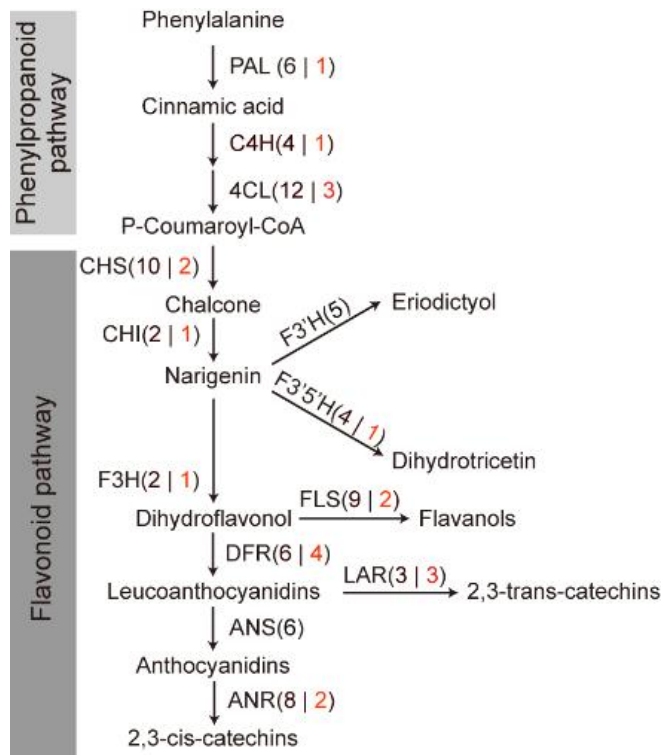

6  
7 **Supplementary Figure S2.** The proposed pathway related to flavonoid biosynthesis. Black  
8 and red numbers in brackets following each gene indicate the number of expressed  
9 full-length and AS genes identified in eight tissues, respectively.

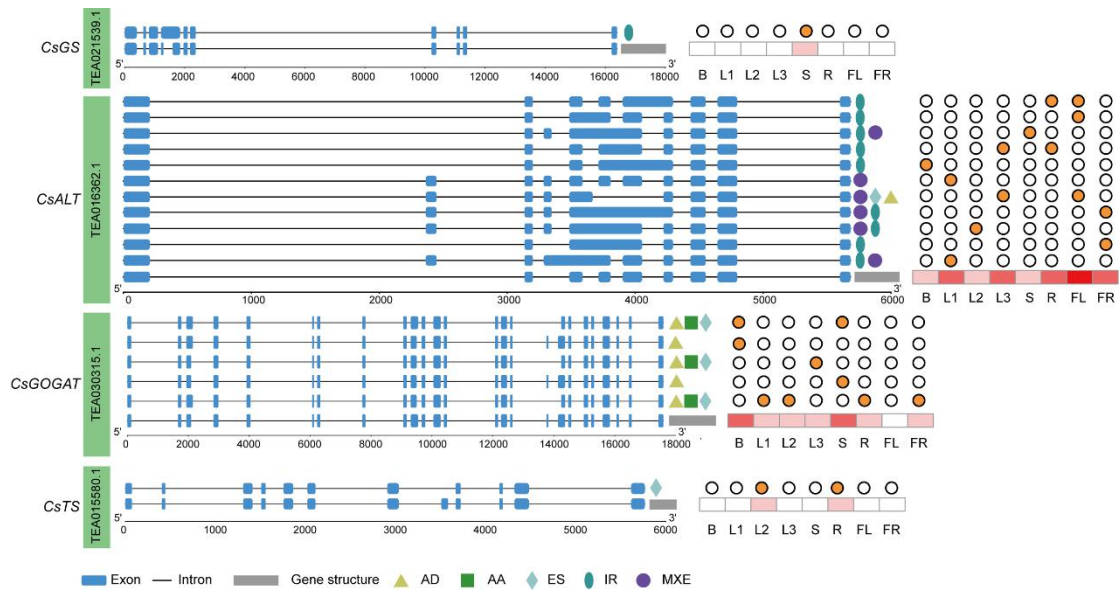

10

11 **Supplementary Figure S3.** Alternative spliced isoforms of theanine-related genes in tea  
 12 plant. The orange solid dot indicate the targeted AS transcripts identified in specific tissues (B,  
 13 bud; YL, young leaf; SML, summer mature leaf; WOL, winter old leaf; S, stem; R, root; FL,  
 14 flower; FR, fruit).

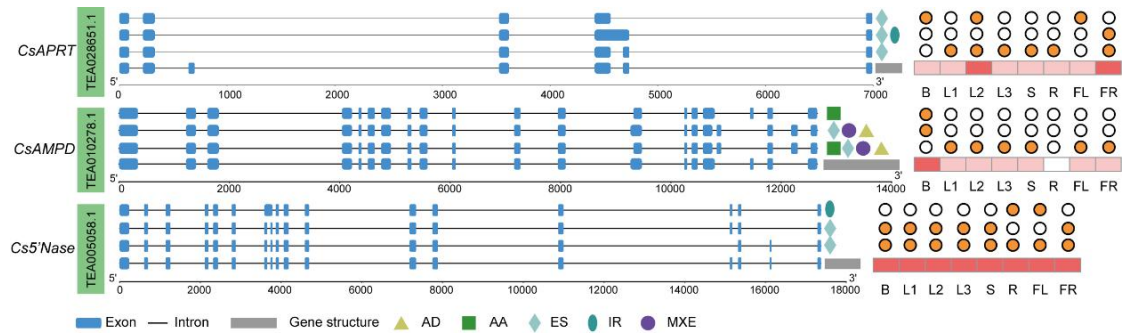

15

16 **Supplementary Figure S4.** Alternatively spliced isoforms of caffeine-related genes in tea  
 17 plant. The orange solid dot indicates the targeted AS transcripts identified in specific tissues  
 18 (B, bud; YL, young leaf; SML, summer mature leaf; WOL, winter old leaf; S, stem; R, root; FL,  
 19 flower; FR, fruit).

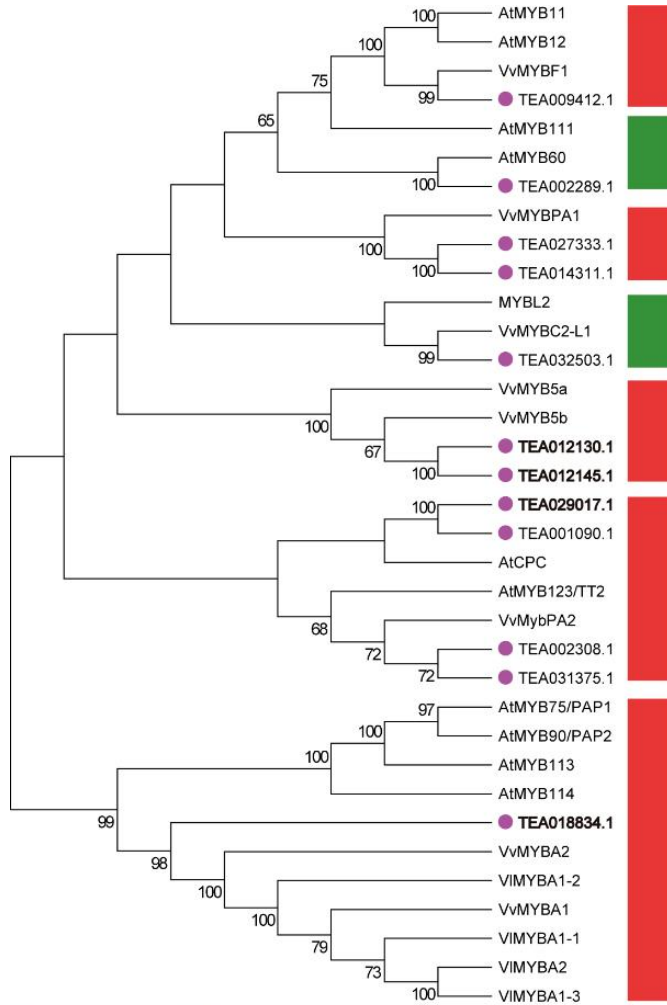

20 ■ Activator ■ Repressor

21 **Supplementary Figure S5.** An unrooted neighbor joining phylogenetic tree constructed from  
 22 12 amino acid sequences of MYBs identified in *C. sinensis* and other species. A bootstrap  
 23 test is set as 1000 to validate the confidence of the classifications. The bootstrap values of  
 24 confidence levels are shown as percentages at the branch nodes. The *CsMYB* genes are  
 25 highlighted by a solid purple circle. The bold font indicates the *CsMYBs* which were identified  
 26 as alternatively spliced genes. AtMYB11 (NP\_191820), AtMYB12 (NP\_182268), AtMYB60  
 27 (NP\_172358), AtMYB111 (NP\_199744), AtMYB123 (NP\_198405), AtCPC (NM\_130205),  
 28 AtMYB75 (NP\_176057), AtMYB90 (NP\_176813), AtMYB113 (NP\_176811), AtMYB114  
 29 (NP\_176812), VvMYBF1 (GQ423422), VvMYBPA1 (AM259485), VvMYBC2-L1 (JX050227),  
 30 VvMYB5a (AY555190), VvMYB5b (AY899404), VvMYBPA2 (EU919682), VvMYBA1  
 31 (AB097923), VvMYBA2 (AB097924), VIMYBA1-1 (AB073010), VIMYBA1-2 (AB073012),  
 32 VIMYBA2 (AB073013), VIMYBA1-3 (AB427165).

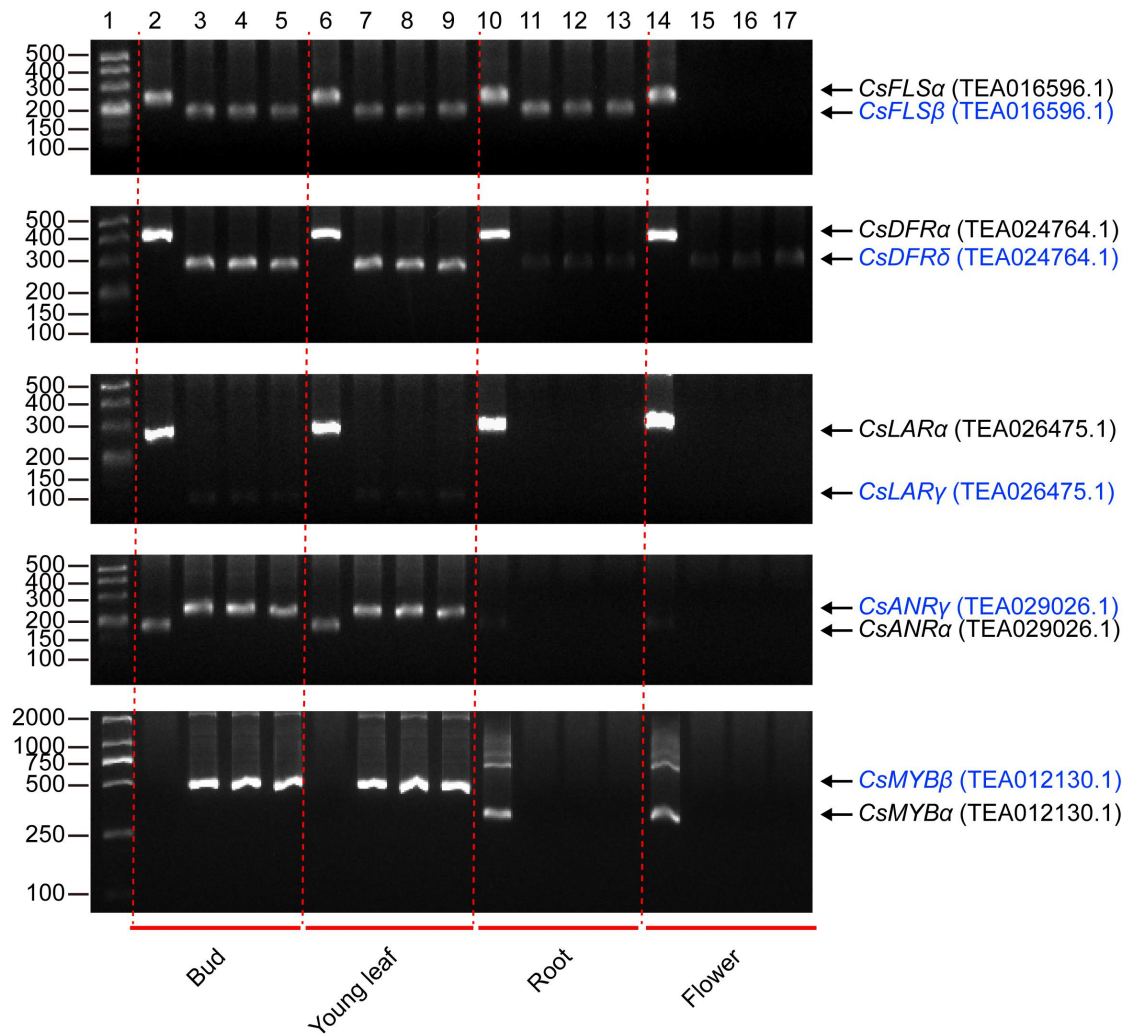

34

35

36 **Supplementary Figure S6.** Validation of AS isoforms using independent samples by  
 37 RT-PCR. The AS isoforms were verified by RT-PCR in four tissues (bud, young leaf, root and  
 38 flower) and each tissue was performed with three biological replicates. Lane 1, 500bp DNA  
 39 maker. Lane 2, 6, 10 and 14, full-length transcripts of corresponding genes. Lane 3, 4 and 5,  
 40 AS isoforms in bud. Lane 7, 8 and 9, AS isoforms in young leaf. Lane 11, 12 and 13, AS  
 41 isoforms in root. Lane 15, 16 and 17, AS isoforms in flower.  $\beta$  isoforms marked with blue  
 42 represent the AS isoforms,  $\alpha$  isoforms marked with black represent the full-length transcripts.

**Table. S1 Statistics of different AS events obtained from the Illumina libraries generated in this study**

|                           | Illumina |            |            |            |                    |            |                 |            |        |            |        |            |        |            |        |            |
|---------------------------|----------|------------|------------|------------|--------------------|------------|-----------------|------------|--------|------------|--------|------------|--------|------------|--------|------------|
|                           | Bud      |            | Young leaf |            | Summer mature leaf |            | Winter old leaf |            | Stem   |            | Root   |            | Flower |            | Fruit  |            |
|                           | Number   | Percentage | Number     | Percentage | Number             | Percentage | Number          | Percentage | Number | Percentage | Number | Percentage | Number | Percentage | Number | Percentage |
| Alternative donor site    | 3911     | 16.17%     | 3831       | 16.01%     | 3961               | 16.09%     | 4155            | 16.07%     | 4078   | 15.98%     | 3659   | 16.12%     | 3723   | 16.20%     | 3693   | 16.02%     |
| Alternative acceptor site | 4261     | 17.62%     | 4226       | 17.66%     | 4289               | 17.43%     | 4563            | 17.65%     | 4568   | 17.90%     | 3940   | 17.36%     | 4068   | 17.70%     | 4115   | 17.85%     |
| Intron retention          | 4753     | 19.65%     | 4727       | 19.76%     | 4807               | 19.53%     | 5314            | 20.55%     | 5111   | 20.03%     | 4470   | 19.69%     | 4446   | 19.34%     | 4660   | 20.22%     |
| Exon skipping             | 4055     | 16.77%     | 4008       | 16.75%     | 4177               | 16.97%     | 4417            | 17.08%     | 4205   | 16.47%     | 3913   | 17.24%     | 3939   | 17.14%     | 3769   | 16.35%     |
| Others                    | 7199     | 29.79%     | 7127       | 29.82%     | 7371               | 29.98%     | 7402            | 28.65%     | 7554   | 29.62%     | 6711   | 29.59%     | 6801   | 29.62%     | 6808   | 29.56%     |
| Total events              | 24179    | 100.00%    | 23919      | 100.00%    | 24605              | 100.00%    | 25851           | 100.00%    | 25516  | 100.00%    | 22693  | 100.00%    | 22977  | 100.00%    | 23045  | 100.00%    |

**Table. S2** Statistic analysis of characterization of identified AS genes in different tissues

|                                     | AS types |
|-------------------------------------|----------|
| <b>Serine/arginine-rich protein</b> |          |
| TEA002926.1                         | AA       |
| TEA029911.1                         | ES       |
| TEA027329.1                         | IR       |
| TEA008450.1                         | ES       |
| TEA025233.1                         | ES       |
| TEA004460.1                         | AA,AD    |
| TEA008159.1                         | ES       |
| TEA023301.1                         | ES       |
| <b>U2af-like protein</b>            |          |
| TEA007383.1                         | ES       |
| TEA027719.1                         | ES       |
| TEA025294.1                         | AD       |
| TEA031074.1                         | IR       |
| TEA002124.1                         | AA       |
| <b>3B-like protein</b>              |          |
| TEA033372.1                         | ES       |
| TEA002823.1                         | AA       |
| TEA023785.1                         | IR       |

AA (Alternative Acceptor site), IR (Intron Retention), AD (Alternative Donor site), ES (Exon Skipping).

**Table. S3 Statistics of different AS events obtained from the specific modules based on WGCNA analysis**

|                           | Illumina |            |        |            |        |            |        |            |        |            |        |            |
|---------------------------|----------|------------|--------|------------|--------|------------|--------|------------|--------|------------|--------|------------|
|                           | Black    |            | Blue   |            | Pink   |            | Green  |            | Red    |            | Brown  |            |
|                           | Number   | Percentage | Number | Percentage | Number | Percentage | Number | Percentage | Number | Percentage | Number | Percentage |
| Alternative donor site    | 339      | 16.22%     | 739    | 15.79%     | 296    | 17.98%     | 429    | 16.50%     | 420    | 17.07%     | 511    | 15.32%     |
| Alternative acceptor site | 375      | 17.94%     | 813    | 17.37%     | 300    | 18.22%     | 437    | 16.81%     | 460    | 18.69%     | 568    | 17.03%     |
| Intron retention          | 352      | 16.84%     | 878    | 18.76%     | 313    | 19.01%     | 577    | 22.20%     | 445    | 18.08%     | 705    | 21.13%     |
| Exon skipping             | 370      | 17.70%     | 827    | 17.67%     | 245    | 14.88%     | 412    | 15.85%     | 396    | 16.09%     | 550    | 16.49%     |
| Others                    | 654      | 31.30%     | 1421   | 30.41%     | 492    | 29.91%     | 744    | 28.64%     | 739    | 30.07%     | 1001   | 30.03%     |
| Total events              | 2090     | 100.00%    | 4678   | 100.00%    | 1646   | 100.00%    | 2599   | 100.00%    | 2460   | 100.00%    | 3335   | 100.00%    |

**Table. S4 Statistical analysis of characterized AS genes identified in different tissues**

|             | Bud | Young leaf | Summer mature leaf | Winter old leaf | Stem | Root | Flower | Fruit | AS types    | RNA-Seq technique |
|-------------|-----|------------|--------------------|-----------------|------|------|--------|-------|-------------|-------------------|
| <b>PAL</b>  |     |            |                    |                 |      |      |        |       |             |                   |
| TEA003146.1 | •   |            |                    |                 |      |      |        |       | AA          |                   |
| <b>4CL</b>  |     |            |                    |                 |      |      |        |       |             | Illumina          |
| TEA031662.1 | •   | •          | •                  |                 |      |      |        |       | IR<br>IR,AA |                   |





|             |   |   |   |  |   |   |       |
|-------------|---|---|---|--|---|---|-------|
| TEA022952.1 | • |   | • |  | • |   | IR    |
| TEA029026.1 |   |   | • |  | • |   | IR    |
|             |   |   |   |  | • |   | AD,IR |
| <b>MYB</b>  |   |   |   |  |   |   |       |
| TEA012130.1 | • | • |   |  |   |   | IR    |
| TEA029017.1 | • | • | • |  |   |   | AA    |
| TEA018834.1 |   |   |   |  |   | • | IR    |
| TEA012145.1 |   |   |   |  | • |   | IR    |

**C4H**

|             |  |  |  |  |  |  |    |
|-------------|--|--|--|--|--|--|----|
| TEA014865.1 |  |  |  |  |  |  | ES |
|-------------|--|--|--|--|--|--|----|

**4CL**

|             |  |  |  |  |  |  |    |
|-------------|--|--|--|--|--|--|----|
| TEA018046.1 |  |  |  |  |  |  | ES |
|-------------|--|--|--|--|--|--|----|

**CHS**

|             |  |  |  |  |  |  |    |
|-------------|--|--|--|--|--|--|----|
| TEA023332.1 |  |  |  |  |  |  | AD |
|-------------|--|--|--|--|--|--|----|

|             |  |  |  |  |  |  |    |
|-------------|--|--|--|--|--|--|----|
| TEA023340.1 |  |  |  |  |  |  | IR |
|-------------|--|--|--|--|--|--|----|

**F35H**

|             |  |  |  |  |  |  |    |
|-------------|--|--|--|--|--|--|----|
| TEA013309.1 |  |  |  |  |  |  | AD |
|-------------|--|--|--|--|--|--|----|

**FLS**

|             |  |  |  |  |  |  |    |
|-------------|--|--|--|--|--|--|----|
| TEA016596.1 |  |  |  |  |  |  | IR |
|-------------|--|--|--|--|--|--|----|

**LAR**

|             |  |  |  |  |  |  |    |
|-------------|--|--|--|--|--|--|----|
| TEA027557.1 |  |  |  |  |  |  | IR |
|-------------|--|--|--|--|--|--|----|

**ANR**

SMRT

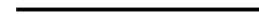

|             |    |
|-------------|----|
| TEA022952.1 | IR |
| MYB         | IR |
| TEA012130.1 | IR |

AA (Alternative Acceptor site), IR (Intron Retention), AD (Alternative Donor site), ES (Exon Skipping). Illumina and SMRT indicates the AS genes are detected from Illumina paired-end RNA-seq data and Single molecule real-time DNA sequencing data, respectively. The solid dot indicated the targeted AS transcripts identified in specific tissues.

**Table. S5 Primers used in this study (application details of primers are described in the materials and methods)**

| Primer name | Sequence(5'-3')          | Target gene          |
|-------------|--------------------------|----------------------|
| P1-F        | AAGAGCTCATTAGATTTTTGAATG | TEA003146.1 $\alpha$ |
| P2-R        | AAGCATGGAGTGATGTTGTG     |                      |
| P3-F        | CATGGCCAGCAGTGATTG       | TEA003146.1 $\beta$  |
| P4-R        | AAGCATGGAGTGATGTTGTG     |                      |
| P5-F        | AAGGCTATCAGGTTGCTCC      | TEA031662.1 $\alpha$ |
| P6-R        | CATCTGGGTACGGAACCA       |                      |
| P7-F        | TAGTAGCGCAGGGTCATC       | TEA031662.1 $\beta$  |
| P8-R        | GATTTGTATTGCATTATTGCATAC |                      |
| P9-F        | ATGGTCTGACAGAATCAACTG    | TEA031662.1 $\gamma$ |
| P10-R       | GATGCTAACCAAGATTGAATAG   |                      |
| P1-F        | TTCTAGAAGTACCGGTGATC     | TEA016596.1 $\alpha$ |
| P12-R       | TGCTCTTAGACTCAGCATC      |                      |
| P13-F       | AACCATGGGATACCAGATG      | TEA016596.1 $\beta$  |

|       |                        |                      |
|-------|------------------------|----------------------|
| P14-R | CTTTCTTCCCTTCAACTTCC   |                      |
| P15-F | ATGACTGGATGGATGTATTTTG |                      |
| P16-R | TTGAATCCTAGGTCCAACAG   | TEA024764.1 $\alpha$ |
| P17-F | ATGACTGGATGGGAAATGAAC  |                      |
| P18-R | TTGAATCCTAGGTCCAACAG   | TEA024764.1 $\beta$  |
| P19-F | ATCCTGAGATGTATTTTGTGG  |                      |
| P20-R | TTGAATCCTAGGTCCAACAG   | TEA024764.1 $\gamma$ |
| P21-F | AGCACTTCACCCAACGCT     |                      |
| P22-R | TTGAATCCTAGGTCCAACAG   | TEA024764.1 $\delta$ |
| P23-F | GTTGATGGGTCTGATATTGG   |                      |
| P24-R | CATCTGGATAGAGATTGCTC   | TEA026475.1 $\alpha$ |
| P25-F | ACTGTCAAAGTTGTGGACG    |                      |
| P26-R | CAACTTCATTTGGACCATCAA  | TEA026475.1 $\beta$  |
| P27-F | ACTGTCAAAGAGAATATCATAC |                      |
| P28-R | TAACTTGACAACCCTTGATG   | TEA026475.1 $\gamma$ |
| P29-F | AGAGCTCTCAGTAATACATC   |                      |
| P30-R | GAGAAGTCCAAGAGGATTC    | TEA029026.1 $\alpha$ |
| P31-F | ATTCATGATTTCTCTTGTTGTC |                      |
| P32-R | TTATAGCCAGACCCATCTTC   | TEA029026.1 $\beta$  |
| P33-F | AGCTTCTTAGTAATACATCTG  |                      |
| P34-R | GAGAAGTCCAAGAGGATTC    | TEA029026.1 $\gamma$ |
| P35-F | CAGGTCTACAATCCGTATAG   |                      |
| P36-R | CTCACCATGATAATACTGGC   | TEA012130.1 $\alpha$ |
| P37-F | TTCTACTACTTGTCAATTAGGG | TEA012130.1 $\beta$  |

|       |                         |                      |
|-------|-------------------------|----------------------|
| P38-R | CTCACCATGATAAATACTGGC   |                      |
| P39-F | ACGAACCGATAATGAGATTAAG  |                      |
| P40-R | CACTTCCTTTGGTGCCTTC     | TEA029017.1 $\alpha$ |
| P41-F | ATTAGGGAACAGGAAAATAAATC |                      |
| P42-R | GACGTCAGAGTCTGCAGT      | TEA029017.1 $\beta$  |

---
